# Supplementary material
Source: PubMed Central journal article supplement (PMC7047085)
Supplement: Supp_FigS1.pdf [file Supp_FigS1.pdf]

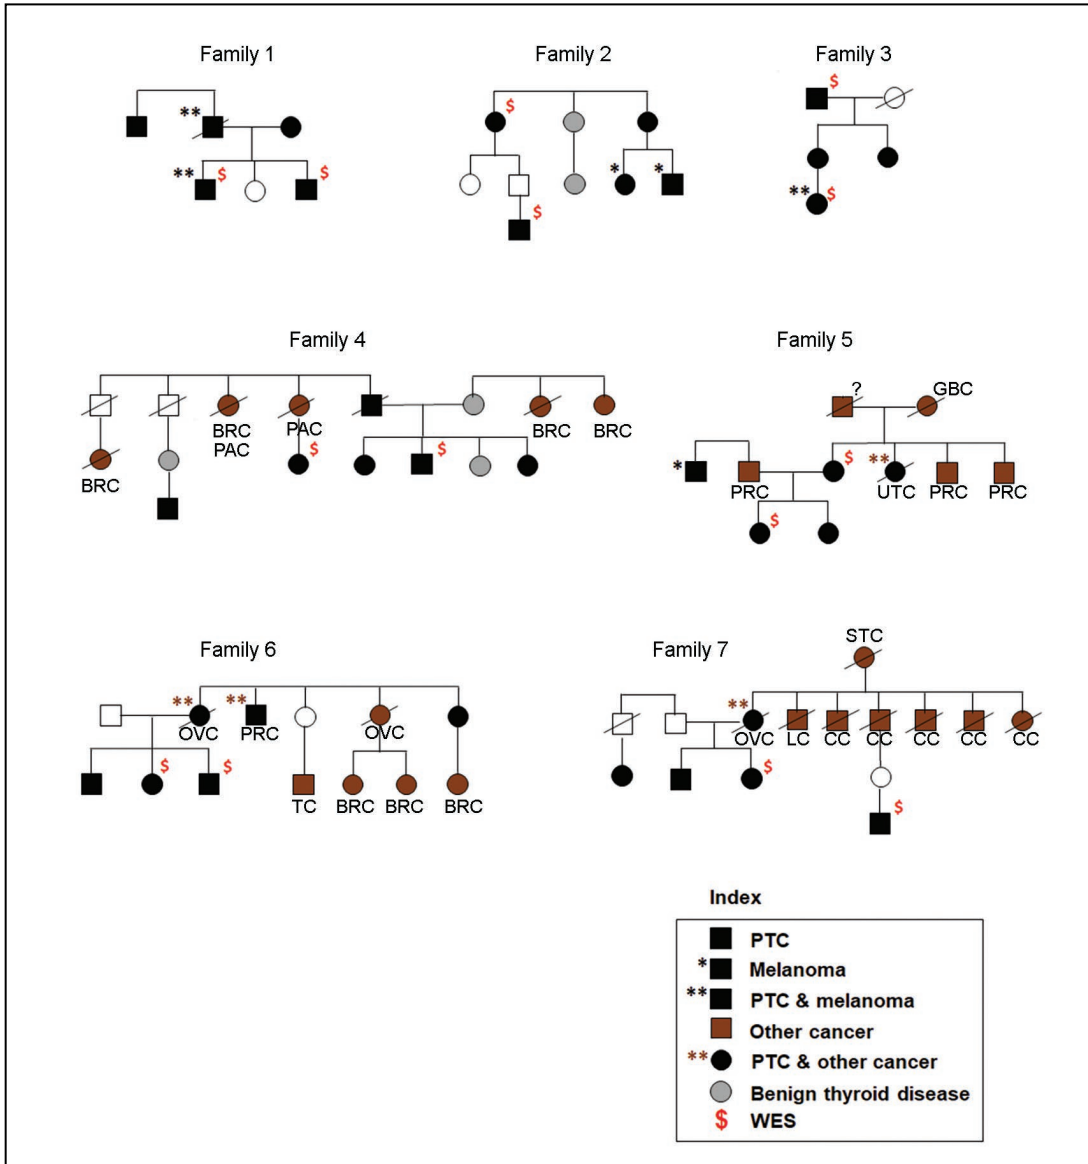

**Supplementary Figure S1. Simplified pedigrees of 7 families.** Two individuals per family were selected for whole exome sequencing (WES). Affected individuals with PTC, melanoma, and other types of malignancy are labeled as indicated. BRC, breast cancer; CC, colon cancer; GBC, gallbladder cancer; OVC, ovarian cancer; PAC, pancreatic cancer; PRC, prostate cancer; STC, stomach cancer; UTC, uterine cancer.
