# Supplementary material
Source: PubMed Central journal article supplement (PMC7047085)
Supplement: Supp_FigS2-TableS1.pdf [file Supp_FigS2-TableS1.pdf]

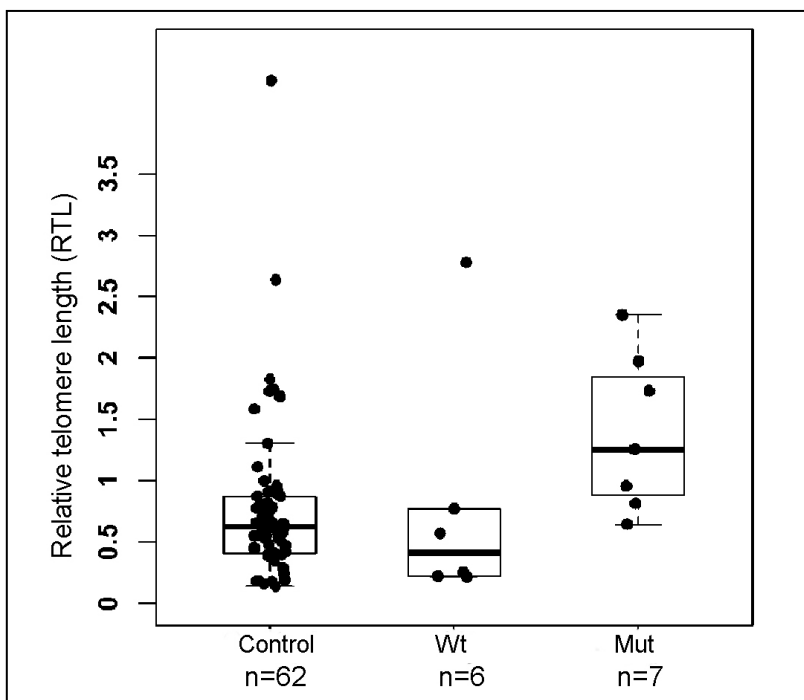

**Supplementary Fig. S2. Relative telomere length (RTL) measurement.** The RTLs with genomic DNAs extracted from whole blood from family members with or without the *TINF2* mutation and healthy controls were measured using a quantitative PCR assay. The primers for telomere are: Forward, 5'-ACACTAAGGTTTGGGTTTGGGTTTGGGTTTGGGTTAGTGT; Reverse, 5'-TGTTAGGTATCCCTATCCCTATCCCTATCCCTATCCCTAACA, as described (Cawthon RM. Nucleic Acids Research 2009 Feb; 37(3): e21). The Kruskal–Wallis test was performed for comparing the three groups, with a p value of 0.012. The Tukey-Kramer test was performed for the pairwise comparison. The RTL of the individuals with the *TINF2* (Mut) is significantly longer than those with the wild-type *TINF2* (Wt) and the control group, with p values of 0.027 and 0.014, respectively.

| Supplementary Table S1. Primer sequences |                      |
|------------------------------------------|----------------------|
| Name                                     | Sequence             |
| Sanger sequencing:                       |                      |
| TINF2-Forward                            | ctggggcaaacatgtaagg  |
| TINF2-Reverse                            | gatggtcctgaggaagatg  |
| RT-PCR:                                  |                      |
| TINF2-Forward                            | gatttggaggcacaggaaa  |
| TINF2-Reverse                            | ccagaaagggttcccatac  |
| GAPDH-Forward                            | caccaactgcttagcacccc |
| GAPDH-Reverse                            | tcttctgggtggcagtgatg |
