# Supplementary material
Source: PubMed Central journal article supplement (PMC7047085)
Supplement: Supp_TableS2.pdf [file Supp_TableS2.pdf]

Supplementary Table S2. VEP annotation of 3 missense variants in the shelterin genes in 24 NMTC families (Part 1)

| dbSNP        | Location             | Allele | Consequence                            | IMPACT   | SYMBOL |
|--------------|----------------------|--------|----------------------------------------|----------|--------|
| rs1464083474 | 14:24709044-24709044 | G      | missense_variant                       | MODERATE | TINF2  |
| rs1464083474 | 14:24709044-24709044 | G      | missense_variant                       | MODERATE | TINF2  |
| rs1464083474 | 14:24709044-24709044 | G      | missense_variant                       | MODERATE | TINF2  |
| rs1464083474 | 14:24709044-24709044 | G      | missense_variant                       | MODERATE | TINF2  |
| rs202093758  | 14:24711465-24711465 | G      | missense_variant                       | MODERATE | TINF2  |
| rs202093758  | 14:24711465-24711465 | G      | missense_variant                       | MODERATE | TINF2  |
| rs202093758  | 14:24711465-24711465 | G      | missense_variant                       | MODERATE | TINF2  |
| rs202093758  | 14:24711465-24711465 | G      | missense_variant                       | MODERATE | TINF2  |
| rs202093758  | 14:24711465-24711465 | G      | missense_variant                       | MODERATE | TINF2  |
| rs202093758  | 14:24711465-24711465 | G      | missense_variant                       | MODERATE | TINF2  |
| rs202093758  | 14:24711465-24711465 | G      | missense_variant                       | MODERATE | TINF2  |
| rs202093758  | 14:24711465-24711465 | G      | missense_variant                       | MODERATE | TINF2  |
| rs202093758  | 14:24711465-24711465 | G      | missense_variant                       | MODERATE | TINF2  |
| rs202093758  | 14:24711465-24711465 | G      | missense_variant                       | MODERATE | TINF2  |
| rs202093758  | 14:24711465-24711465 | G      | missense_variant                       | MODERATE | TINF2  |
| rs142662151  | 16:67693939-67693939 | T      | missense_variant                       | MODERATE | ACD    |
| rs142662151  | 16:67693939-67693939 | T      | missense_variant                       | MODERATE | ACD    |
| rs142662151  | 16:67693939-67693939 | T      | missense_variant                       | MODERATE | ACD    |
| rs142662151  | 16:67693939-67693939 | T      | missense_variant,splice_region_variant | MODERATE | ACD    |
| rs142662151  | 16:67693939-67693939 | T      | missense_variant,splice_region_variant | MODERATE | ACD    |
| rs142662151  | 16:67693939-67693939 | T      | missense_variant,splice_region_variant | MODERATE | ACD    |
| rs142662151  | 16:67693939-67693939 | T      | missense_variant,splice_region_variant | MODERATE | ACD    |

Supplementary Table S2, Part 2

| dbSNP        | SYMBOL | Gene            | EXON | cDNA_position | CDS_position | Protein_position | Amino_acids | Codons  |
|--------------|--------|-----------------|------|---------------|--------------|------------------|-------------|---------|
| rs1464083474 | TINF2  | ENSG00000092330 | 9/9  | 1657          | 1315         | 439              | V/L         | Gtt/Ctt |
| rs1464083474 | TINF2  | ENSG00000092330 | 8/8  | 1483          | 1210         | 404              | V/L         | Gtt/Ctt |
| rs1464083474 | TINF2  | 26277           | 9/9  | 1657          | 1315         | 439              | V/L         | Gtt/Ctt |
| rs1464083474 | TINF2  | 26277           | 8/8  | 1905          | 1210         | 404              | V/L         | Gtt/Ctt |
| rs202093758  | TINF2  | ENSG00000092330 | 1/9  | 416           | 74           | 25               | G/A         | gGa/gCa |
| rs202093758  | TINF2  | ENSG00000092330 | 1/6  | 405           | 74           | 25               | G/A         | gGa/gCa |
| rs202093758  | TINF2  | ENSG00000092330 | 1/8  | 347           | 74           | 25               | G/A         | gGa/gCa |
| rs202093758  | TINF2  | ENSG00000092330 | 1/2  | 300           | 74           | 25               | G/A         | gGa/gCa |
| rs202093758  | TINF2  | ENSG00000092330 | 1/4  | 355           | 74           | 25               | G/A         | gGa/gCa |
| rs202093758  | TINF2  | ENSG00000092330 | 1/2  | 374           | 74           | 25               | G/A         | gGa/gCa |
| rs202093758  | TINF2  | ENSG00000092330 | 1/7  | 30            | 32           | 11               | G/A         | gGa/gCa |
| rs202093758  | TINF2  | 26277           | 1/9  | 416           | 74           | 25               | G/A         | gGa/gCa |
| rs202093758  | TINF2  | 26277           | 1/6  | 416           | 74           | 25               | G/A         | gGa/gCa |
| rs202093758  | TINF2  | 26277           | 1/9  | 416           | 74           | 25               | G/A         | gGa/gCa |
| rs202093758  | TINF2  | 26277           | 1/8  | 769           | 74           | 25               | G/A         | gGa/gCa |
| rs142662151  | ACD    | ENSG00000102977 | 2/12 | 632           | 367          | 123              | D/N         | Gac/Aac |
| rs142662151  | ACD    | 65057           | 2/12 | 704           | 367          | 123              | D/N         | Gac/Aac |
| rs142662151  | ACD    | 65057           | 2/11 | 649           | 367          | 123              | D/N         | Gac/Aac |
| rs142662151  | ACD    | ENSG00000102977 | 2/12 | 690           | 358          | 120              | D/N         | Gac/Aac |
| rs142662151  | ACD    | ENSG00000102977 | 2/12 | 119           | 121          | 41               | D/N         | Gac/Aac |
| rs142662151  | ACD    | 65057           | 2/12 | 695           | 358          | 120              | D/N         | Gac/Aac |
| rs142662151  | ACD    | 65057           | 2/12 | 695           | 358          | 120              | D/N         | Gac/Aac |

Supplementary Table S2, Part 3

| dbSNP        | SYMBOL | FLAGS        | SYMBOL_SOURCE | HGNC_ID | SOURCE  | GIVEN_REF | USED_REF | BAM_EDIT |
|--------------|--------|--------------|---------------|---------|---------|-----------|----------|----------|
| rs1464083474 | TINF2  | -            | HGNC          | 11824   | Ensembl | C         | C        | -        |
| rs1464083474 | TINF2  | -            | HGNC          | 11824   | Ensembl | C         | C        | -        |
| rs1464083474 | TINF2  | -            | EntrezGene    | 11824   | RefSeq  | C         | C        | OK       |
| rs1464083474 | TINF2  | -            | EntrezGene    | 11824   | RefSeq  | C         | C        | -        |
| rs202093758  | TINF2  | -            | HGNC          | 11824   | Ensembl | C         | C        | -        |
| rs202093758  | TINF2  | -            | HGNC          | 11824   | Ensembl | C         | C        | -        |
| rs202093758  | TINF2  | cds_end_NF   | HGNC          | 11824   | Ensembl | C         | C        | -        |
| rs202093758  | TINF2  | -            | HGNC          | 11824   | Ensembl | C         | C        | -        |
| rs202093758  | TINF2  | -            | HGNC          | 11824   | Ensembl | C         | C        | -        |
| rs202093758  | TINF2  | cds_start_NF | HGNC          | 11824   | Ensembl | C         | C        | -        |
| rs202093758  | TINF2  | -            | EntrezGene    | 11824   | RefSeq  | C         | C        | OK       |
| rs202093758  | TINF2  | -            | EntrezGene    | 11824   | RefSeq  | C         | C        | OK       |
| rs202093758  | TINF2  | -            | EntrezGene    | 11824   | RefSeq  | C         | C        | -        |
| rs202093758  | TINF2  | -            | EntrezGene    | 11824   | RefSeq  | C         | C        | -        |
| rs142662151  | ACD    | -            | HGNC          | 25070   | Ensembl | C         | C        | -        |
| rs142662151  | ACD    | -            | EntrezGene    | 25070   | RefSeq  | C         | C        | OK       |
| rs142662151  | ACD    | -            | EntrezGene    | 25070   | RefSeq  | C         | C        | -        |
| rs142662151  | ACD    | -            | HGNC          | 25070   | Ensembl | C         | C        | -        |
| rs142662151  | ACD    | cds_start_NF | HGNC          | 25070   | Ensembl | C         | C        | -        |
| rs142662151  | ACD    | -            | EntrezGene    | 25070   | RefSeq  | C         | C        | OK       |
| rs142662151  | ACD    | -            | EntrezGene    | 25070   | RefSeq  | C         | C        | OK       |

Supplementary Table S2, Part 4

| dbSNP        | SYMBOL | SIFT                           | PolyPhen                 | CLIN_SIG               | SOMATIC | PHENO |
|--------------|--------|--------------------------------|--------------------------|------------------------|---------|-------|
| rs1464083474 | TINF2  | tolerated_low_confidence(0.1)  | benign(0.015)            | -                      | -       | -     |
| rs1464083474 | TINF2  | tolerated_low_confidence(0.15) | benign(0.015)            | -                      | -       | -     |
| rs1464083474 | TINF2  | tolerated_low_confidence(0.1)  | benign(0.015)            | -                      | -       | -     |
| rs1464083474 | TINF2  | tolerated_low_confidence(0.15) | benign(0.015)            | -                      | -       | -     |
| rs202093758  | TINF2  | tolerated(0.66)                | benign(0.085)            | benign,likely_benign   | -       | 1     |
| rs202093758  | TINF2  | tolerated(0.68)                | benign(0.085)            | benign,likely_benign   | -       | 1     |
| rs202093758  | TINF2  | tolerated(0.65)                | benign(0.085)            | benign,likely_benign   | -       | 1     |
| rs202093758  | TINF2  | tolerated(0.71)                | benign(0.085)            | benign,likely_benign   | -       | 1     |
| rs202093758  | TINF2  | tolerated(0.78)                | benign(0.209)            | benign,likely_benign   | -       | 1     |
| rs202093758  | TINF2  | tolerated(0.73)                | benign(0.358)            | benign,likely_benign   | -       | 1     |
| rs202093758  | TINF2  | tolerated(0.7)                 | benign(0.205)            | benign,likely_benign   | -       | 1     |
| rs202093758  | TINF2  | tolerated(0.66)                | benign(0.085)            | benign,likely_benign   | -       | 1     |
| rs202093758  | TINF2  | tolerated(0.68)                | benign(0.085)            | benign,likely_benign   | -       | 1     |
| rs202093758  | TINF2  | -                              | -                        | benign,likely_benign   | -       | 1     |
| rs202093758  | TINF2  | tolerated(0.65)                | benign(0.085)            | benign,likely_benign   | -       | 1     |
| rs142662151  | ACD    | deleterious(0)                 | benign(0.408)            | uncertain_significance | -       | 1     |
| rs142662151  | ACD    | deleterious(0)                 | benign(0.408)            | uncertain_significance | -       | 1     |
| rs142662151  | ACD    | -                              | -                        | uncertain_significance | -       | 1     |
| rs142662151  | ACD    | tolerated(0.09)                | benign(0.31)             | uncertain_significance | -       | 1     |
| rs142662151  | ACD    | tolerated(0.07)                | possibly_damaging(0.471) | uncertain_significance | -       | 1     |
| rs142662151  | ACD    | tolerated(0.09)                | possibly_damaging(0.76)  | uncertain_significance | -       | 1     |
| rs142662151  | ACD    | tolerated(0.09)                | benign(0.31)             | uncertain_significance | -       | 1     |

Supplementary Table S2, Part 5

| dbSNP        | SYMBOL | PUBMED | MOTIF_NAME | CADD_PHRED | CADD_RAW  |
|--------------|--------|--------|------------|------------|-----------|
| rs1464083474 | TINF2  | -      | -          | 0.244      | -0.481501 |
| rs1464083474 | TINF2  | -      | -          | 0.244      | -0.481501 |
| rs1464083474 | TINF2  | -      | -          | 0.244      | -0.481501 |
| rs1464083474 | TINF2  | -      | -          | 0.244      | -0.481501 |
| rs202093758  | TINF2  | -      | -          | 12.31      | 1.307027  |
| rs202093758  | TINF2  | -      | -          | 12.31      | 1.307027  |
| rs202093758  | TINF2  | -      | -          | 12.31      | 1.307027  |
| rs202093758  | TINF2  | -      | -          | 12.31      | 1.307027  |
| rs202093758  | TINF2  | -      | -          | 12.31      | 1.307027  |
| rs202093758  | TINF2  | -      | -          | 12.31      | 1.307027  |
| rs202093758  | TINF2  | -      | -          | 12.31      | 1.307027  |
| rs202093758  | TINF2  | -      | -          | 12.31      | 1.307027  |
| rs202093758  | TINF2  | -      | -          | 12.31      | 1.307027  |
| rs202093758  | TINF2  | -      | -          | 12.31      | 1.307027  |
| rs202093758  | TINF2  | -      | -          | 12.31      | 1.307027  |
| rs202093758  | TINF2  | -      | -          | 12.31      | 1.307027  |
| rs202093758  | TINF2  | -      | -          | 12.31      | 1.307027  |
| rs202093758  | TINF2  | -      | -          | 12.31      | 1.307027  |
| rs142662151  | ACD    | -      | -          | 25.6       | 5.237038  |
| rs142662151  | ACD    | -      | -          | 25.6       | 5.237038  |
| rs142662151  | ACD    | -      | -          | 25.6       | 5.237038  |
| rs142662151  | ACD    | -      | -          | 25.6       | 5.237038  |
| rs142662151  | ACD    | -      | -          | 25.6       | 5.237038  |
| rs142662151  | ACD    | -      | -          | 25.6       | 5.237038  |
| rs142662151  | ACD    | -      | -          | 25.6       | 5.237038  |
| rs142662151  | ACD    | -      | -          | 25.6       | 5.237038  |
| rs142662151  | ACD    | -      | -          | 25.6       | 5.237038  |

VEP, Variant Effect Predictor (<https://useast.ensembl.org/info/docs/tools/vep/index.html>)
